# Supplementary material for: Repositioned Drugs for Chagas Disease Unveiled via Structure-Based Drug Repositioning
Source: PubMed Central journal article supplement (PMC7699892; doi:10.3390/ijms21228809), 2020-11-20
Supplement: ijms-21-08809-s001.pdf [file ijms-21-08809-s001.pdf]

# Supplementary Materials: Supplementary Data: Repositioned Drugs for Chagas Disease Unveiled via Structure-Based Drug Repositioning

Melissa F. Adasme <sup>1</sup> , Sarah Naomi Bolz <sup>1</sup>, Lauren Adelman <sup>1</sup>, Sebastian Salentin <sup>1</sup>, V. Joachim Haupt <sup>1</sup>, Adriana Moreno-Rodríguez <sup>2</sup>, Benjamín Noguera-Torres <sup>3</sup>, Verónica Castillo-Campos <sup>3</sup>, Lilián Yepez-Mulia <sup>4</sup>, José A. De Fuentes-Vicente <sup>5</sup>, Gildardo Rivera <sup>6</sup>, Michael Schroeder <sup>1\*</sup>

**Table S1.** Cofactors excluded from the screen

| Cofactor                                                    | HET ID |
|-------------------------------------------------------------|--------|
| Flavin-Adenine Dinucleotide (FAD)                           | FAD    |
| Magnesium Ion                                               | MG     |
| Dihydroflavine-Adenine Dinucleotide                         | FDA    |
| Nicotinamide-Adenine-Dinucleotide (NAD)                     | NAD    |
| Flavin Mononucleotide                                       | FMN    |
| Nicotinamide Adenine Dinucleotide Phosphate (NADP)          | NAP    |
| Heme                                                        | HEM    |
| Dihydro-Nicotinamide-Adenine-Dinucleotide Phosphate (NADPH) | NDP    |

**Table S2.** Buffer or Solvent ligands excluded from the screen

| Ligand                               | HET ID |
|--------------------------------------|--------|
| Sodium Ion                           | NA     |
| Di(hydroxyethyl)etherDI              | PEG    |
| Acetate ion                          | ACT    |
| Sulfate ion                          | SO4    |
| Triethylene Glycol                   | PGE    |
| Hexane                               | HEX    |
| Glycerol                             | GOL    |
| Phosphate Ion                        | P04    |
| HEPES                                | EPE    |
| Maleic acid                          | MAE    |
| 2-(N-Morpholino)-Ethanesulfonic Acid | MES    |
| Beta-Mercaptoethanol                 | BME    |
| Ethylene Glycol                      | EDO    |
| Dimethyl Sulfoxide                   | DMS    |
| Cobalt Hexamine (III)                | NCO    |
| Dimethylarsinate                     | CAC    |
| Chloride Ion                         | CL     |
| 1,4-Diethylene Dioxide               | DIO    |
| 3-Fluorosialic Acid                  | FSI    |
| 2-Propanol                           | IPA    |
| Ethanol                              | EOH    |



**Table S5.** Pathways of all the targets

| <b>Target</b>                                 | <b>Pathway</b>                  | <b>Action</b>                              |
|-----------------------------------------------|---------------------------------|--------------------------------------------|
| DHFR                                          | folate metabolism               | reduce dihydrofolate methylate dUMP        |
| TS                                            | Pyrimidine biosynthesis         | Cysteine Protease                          |
| Cruzipain                                     | proteolysis                     | isoprenoid synthesis                       |
| Farnesyl Pyrophosphate Synthase               | Ergosterol biosynthesis         | catalyzes sixth step of Glycolysis         |
| Glyceraldehyde 3-Phosphate Dehydrogenase      | Energy Production               | demethylates lanosterol                    |
| Lanosterol 14-alpha Demethylase               | Ergosterol biosynthesis         | cell surface enzyme                        |
| Trans-Sialidase                               | host immune response & invasion | reduction of trypanothione                 |
| Trypanothione Reductase                       | trypanothione synthesis         | triggers host B cell polyclonal activation |
| B Cell Mitogen (Proline Racemase)             | Host immune response            | control cAMP levels                        |
| Cyclic Nucleotide Specific Phosphodiesterase  | cell proliferation & invasion   | in enzyme complexes citric acid cycle      |
| Dihydrolipoyl Dehydrogenase                   | energy metabolism               | oxidation of oorate; reduction of fumarate |
| Dihydroorotate Dehydrogenase                  | pyrimidine biosynthesis         | generates NADPH                            |
| Glucose-6-Phosphate Dehydrogenase             | pentose phosphate               | convert guanine/hypoxanthine bases         |
| HGPRT                                         | purine biosynthesis             | reduces various compounds                  |
| Old Yellow Enzyme (Prostaglandin F2 Synthase) | drug metabolism                 | reduces pteridins                          |
| Pteridine Reductase                           | Pterin/folate biosynthesis      | produce NADPH                              |
| Ribose 5-Phosphate isomerase                  | pentose phosphate pathway       | generates trypanothione precursor          |
| Spermidine Synthase                           | trypanothione synthesis         |                                            |
| Squalene Synthase                             | Ergosterol biosynthesis         | generates sterol precursor                 |
| Triosephosphate Isomerase                     | energy production               | catalyzes fifth step in Glycolysis         |
| UDP-Galactopyranose mutase                    | host immune response            | cell surface sugar production              |
